# Supplementary material for: Gene-Function-Based Clusters Explore Intricate Networks of Gene Expression of Circulating Tumor Cells in Patients with Colorectal Cancer
Source: MDPI journal article supplement (doi:10.3390/biomedicines11010145), 2023-01-06
Supplement: s1 [file s1]

# Gene function-based clusters explore intricate networks of gene expressions in patients with colorectal cancer

Chi-Shuan Huang, Harn-Jing Terng, Yi-Ting Hwang

## Supplementary Tables

### Supplementary Table S1A

Logistic analysis for gene-cluster interactions. Percent of significance (PS) of each cluster-grouped gene for multiple cluster models are listed.

| Model ID                  | Combination | <i>MMD</i> | <i>EIF2S3</i> | <i>EXT2</i> | <i>CPEB4</i> | <i>MCM4</i> | <i>MDM2</i> | <i>WEE1</i> | <i>POLDIP2</i> | <i>ZNF264</i> | <i>RNF4</i> | <i>IRF4</i> | <i>STAT2</i> | <i>GRB2</i> | <i>NF1</i> | <i>DUSP6</i> |
|---------------------------|-------------|------------|---------------|-------------|--------------|-------------|-------------|-------------|----------------|---------------|-------------|-------------|--------------|-------------|------------|--------------|
| <b>Two-cluster models</b> |             |            |               |             |              |             |             |             |                |               |             |             |              |             |            |              |
| M2                        | LY/CY       | 1.0        |               |             |              | 96.0        | 100.0       | 99.8        | 0.0            |               |             |             |              |             |            |              |
| M3                        | LY/TRf      | 29.6       |               |             |              |             |             |             |                | 93.8          | 19.4        |             |              |             |            |              |
| M4                        | LY/TRm      | 5.2        |               |             |              |             |             |             |                |               |             | 0.0         | 21.0         |             |            |              |
| M9                        | TLA/TRf     |            | 100.0         | 90.0        | 100.0        |             |             |             |                | 54.8          | 0.4         |             |              |             |            |              |
| M10                       | TLA/TRm     |            | 99.8          | 94.6        | 100.0        |             |             |             |                |               |             | 0.8         | 2.0          |             |            |              |
| M13                       | TLA/CY      |            | 100.0         | 99.8        | 69.0         | 17.0        | 100.0       | 1.0         | 18.2           |               |             |             |              |             |            |              |
| M15                       | LY/TLA      | 1.2        | 100.0         | 81.8        | 100.0        |             |             |             |                |               |             |             |              |             |            |              |
| M22                       | LY/SN       | 0.0        |               |             |              |             |             |             |                |               |             |             |              | 0.0         | 0.6        | 100.0        |
| M23                       | CY/SN       |            |               |             |              | 87.4        | 100.0       | 11.6        | 6.8            |               |             |             |              | 0.0         | 71.6       | 99.4         |
| M24                       | TLA/SN      |            | 99.8          | 97.4        | 100.0        |             |             |             |                |               |             |             |              | 21.0        | 1.2        | 99.8         |
| M25                       | TRf/SN      |            |               |             |              |             |             |             |                | 84.0          | 76.2        |             |              | 6.8         | 23.4       | 100.0        |
| M26                       | TRm/SN      |            |               |             |              |             |             |             |                |               |             | 0.6         | 2.2          | 0.0         | 3.0        | 100.0        |
| M38                       | CY/TRf      |            |               |             |              | 99.8        | 100.0       | 96.4        | 0.6            | 2.2           | 98.8        |             |              |             |            |              |
| M39                       | CY/TRm      |            |               |             |              | 98.2        | 100.0       | 96.0        | 0.0            |               |             | 0.0         | 0.0          |             |            |              |
| M86                       | TRf/TRm     |            |               |             |              |             |             |             |                | 69.8          | 73.2        | 0.0         | 65.2         |             |            |              |

Supplementary Table S1A (continue)

| Model ID                    | Combination   | MMD   | EIF2S3 | EXT2  | CPEB4 | MCM4 | MDM2  | WEE1 | POLDIP2 | ZNF264 | RNF4  | IRF4 | STAT2 | GRB2 | NF1  | DUSP6 |
|-----------------------------|---------------|-------|--------|-------|-------|------|-------|------|---------|--------|-------|------|-------|------|------|-------|
| <b>Three-cluster models</b> |               |       |        |       |       |      |       |      |         |        |       |      |       |      |      |       |
| M5                          | LY/CY/SN      | 0.0   |        |       |       | 87.2 | 100.0 | 8.6  | 7.8     |        |       |      |       | 0.0  | 69.4 | 99.2  |
| M6                          | LY/TRf/SN     | 0.0   |        |       |       |      |       |      |         | 76.2   | 78.0  |      |       | 7.0  | 13.4 | 100.0 |
| M7                          | LY/TRm/SN     | 0.2   |        |       |       |      |       |      |         |        |       | 0.8  | 2.2   | 0.0  | 1.2  | 100.0 |
| M11                         | TLA/TRf/SN    |       | 92.4   | 97.2  | 100.0 |      |       |      |         | 84.4   | 1.2   |      |       | 42.0 | 20.0 | 99.8  |
| M12                         | TLA/TRm/SN    |       | 100.0  | 95.6  | 100.0 |      |       |      |         |        |       | 11.4 | 30.6  | 40.6 | 1.8  | 100.0 |
| M14                         | TLA/CY/SN     |       | 100.0  | 99.8  | 79.6  | 9.0  | 100.0 | 0.4  | 0.0     |        |       |      |       | 2.0  | 30.8 | 99.0  |
| M16                         | LY/TLA/CY     | 1.0   | 100.0  | 99.8  | 77.8  | 15.4 | 100.0 | 0.2  | 21.2    |        |       |      |       |      |      |       |
| M18                         | LY/TLA/TRf    | 0.0   | 100.0  | 90.2  | 100.0 |      |       |      |         | 46.0   | 0.4   |      |       |      |      |       |
| M19                         | LY/TLA/TRm    | 2.4   | 99.4   | 95.4  | 100.0 |      |       |      |         |        |       | 0.2  | 6.0   |      |      |       |
| M28                         | LY/TLA/SN     | 100.0 | 96.4   | 100.0 | 100.0 |      |       |      |         |        |       |      |       | 81.4 | 0.2  | 100.0 |
| M40                         | LY/CY/TRf     | 0.0   |        |       |       | 99.2 | 100.0 | 96.0 | 0.2     | 3.2    | 98.8  |      |       |      |      |       |
| M42                         | LY/CY/TRm     | 1.2   |        |       |       | 95.6 | 100.0 | 97.8 | 0.0     |        |       | 0.0  | 0.0   |      |      |       |
| M87                         | TLA/CY/TRm    |       | 100.0  | 99.6  | 71.0  | 9.8  | 100.0 | 3.4  | 26.6    |        |       | 1.0  | 0.6   |      |      |       |
| M88                         | TLA/CY/TRf    |       | 100.0  | 77.6  | 38.0  | 29.0 | 100.0 | 1.8  | 24.0    | 5.0    | 53.0  |      |       |      |      |       |
| <b>Four-cluster models</b>  |               |       |        |       |       |      |       |      |         |        |       |      |       |      |      |       |
| M17                         | LY/TLA/CY/SN  | 96.4  | 99.8   | 100.0 | 99.6  | 7.0  | 100.0 | 4.6  | 0.0     |        |       |      |       | 40.6 | 13.4 | 100.0 |
| M20                         | LY/TLA/TRf/SN | 94.6  | 90.6   | 97.2  | 100.0 |      |       |      |         | 19.6   | 2.0   |      |       | 84.0 | 3.0  | 100.0 |
| M21                         | LY/TLA/TRm/SN | 100.0 | 99.4   | 99.6  | 100.0 |      |       |      |         |        |       | 9.0  | 63.0  | 91.6 | 0.6  | 100.0 |
| M41                         | LY/CY/TRf/SN  | 1.0   |        |       |       | 97.4 | 100.0 | 0.2  | 1.4     | 32.4   | 100.0 |      |       | 3.6  | 98.8 | 98.2  |
| M43                         | LY/CY/TRm/SN  | 0.0   |        |       |       | 96.2 | 100.0 | 6.2  | 6.6     |        |       | 0.0  | 37.2  | 0.0  | 78.2 | 100.0 |
| M85                         | TLA/CY/TRf/SN |       | 99.0   | 91.2  | 65.8  | 9.4  | 100.0 | 0.4  | 0.0     | 69.6   | 69.0  |      |       | 18.6 | 84.0 | 97.4  |
| M105                        | TLA/CY/TRm/SN |       | 100.0  | 99.8  | 77.4  | 3.8  | 100.0 | 0.2  | 0.0     |        |       | 1.0  | 43.6  | 6.6  | 39.6 | 99.6  |

## Supplementary Table S1B

Logistic analysis for cluster-cluster interactions. Odds ratio (OR) of each cluster-grouped gene for multiple cluster models are listed.

| Model ID                  | Combination | MMD  | EIF2S3 | EXT2 | CPEB4 | MCM4 | MDM2 | WEE1 | POLDIP2 | ZNF264 | RNF4 | IRF4 | STAT2 | GRB2 | NF1  | DUSP6 |
|---------------------------|-------------|------|--------|------|-------|------|------|------|---------|--------|------|------|-------|------|------|-------|
| <b>Two-cluster models</b> |             |      |        |      |       |      |      |      |         |        |      |      |       |      |      |       |
| M2                        | LY/CY       | 1.14 |        |      |       | 2.09 | 5.87 | 0.40 | 0.92    |        |      |      |       |      |      |       |
| M3                        | LY/TRf      | 1.23 |        |      |       |      |      |      |         | 1.95   | 0.66 |      |       |      |      |       |
| M4                        | LY/TRm      | 1.16 |        |      |       |      |      |      |         |        |      | 1.04 | 1.42  |      |      |       |
| M9                        | TLA/TRf     |      | 0.32   | 0.40 | 2.87  |      |      |      |         | 1.80   | 1.02 |      |       |      |      |       |
| M10                       | TLA/TRm     |      | 0.33   | 0.46 | 2.87  |      |      |      |         |        |      | 1.17 | 1.36  |      |      |       |
| M13                       | TLA/CY      |      | 0.19   | 0.25 | 1.72  | 1.58 | 8.66 | 0.77 | 1.62    |        |      |      |       |      |      |       |
| M15                       | LY/TLA      | 0.85 | 0.34   | 0.55 | 3.43  |      |      |      |         |        |      |      |       |      |      |       |
| M22                       | LY/SN       | 0.90 |        |      |       |      |      |      |         |        |      |      |       | 1.10 | 0.82 | 2.76  |
| M23                       | CY/SN       |      |        |      |       | 2.00 | 6.01 | 0.66 | 0.64    |        |      |      |       | 1.00 | 0.42 | 2.19  |
| M24                       | TLA/SN      |      | 0.30   | 0.35 | 2.82  |      |      |      |         |        |      |      |       | 1.65 | 0.74 | 2.35  |
| M25                       | TRf/SN      |      |        |      |       |      |      |      |         | 2.06   | 0.46 |      |       | 1.32 | 0.58 | 2.45  |
| M26                       | TRm/SN      |      |        |      |       |      |      |      |         |        |      | 1.19 | 0.75  | 1.11 | 0.74 | 2.87  |
| M38                       | CY/TRf      |      |        |      |       | 2.45 | 8.44 | 0.46 | 1.21    | 1.40   | 0.29 |      |       |      |      |       |
| M39                       | CY/TRm      |      |        |      |       | 2.18 | 5.95 | 0.42 | 0.93    |        |      | 0.98 | 0.99  |      |      |       |
| M86                       | TRf/TRm     |      |        |      |       |      |      |      |         | 1.77   | 0.47 | 1.12 | 1.67  |      |      |       |

Supplementary Table S1B (continue)

| Model ID                    | Combination   | MMD  | EIF2S3 | EXT2 | CPEB4 | MCM4 | MDM2  | WEE1 | POLDIP2 | ZNF264 | RNF4 | IRF4 | STAT2 | GRB2 | NF1  | DUSP6 |
|-----------------------------|---------------|------|--------|------|-------|------|-------|------|---------|--------|------|------|-------|------|------|-------|
| <b>Three-cluster models</b> |               |      |        |      |       |      |       |      |         |        |      |      |       |      |      |       |
| M5                          | LY/CY/SN      | 0.95 |        |      |       | 2.03 | 5.96  | 0.67 | 0.63    |        |      |      |       | 1.02 | 0.42 | 2.24  |
| M6                          | LY/TRf/SN     | 0.92 |        |      |       |      |       |      |         | 2.00   | 0.46 |      |       | 1.35 | 0.61 | 2.55  |
| M7                          | LY/TRm/SN     | 0.89 |        |      |       |      |       |      |         |        |      | 1.20 | 0.75  | 1.13 | 0.77 | 3.05  |
| M11                         | TLA/TRf/SN    |      | 0.35   | 0.23 | 2.90  |      |       |      |         | 2.31   | 0.80 |      |       | 1.83 | 0.50 | 2.26  |
| M12                         | TLA/TRm/SN    |      | 0.25   | 0.36 | 2.79  |      |       |      |         |        |      | 1.41 | 0.58  | 1.79 | 0.70 | 2.75  |
| M14                         | TLA/CY/SN     |      | 0.21   | 0.17 | 1.88  | 1.51 | 7.48  | 1.30 | 0.93    |        |      |      |       | 1.56 | 0.45 | 2.20  |
| M16                         | LY/TLA/CY     | 0.84 | 0.19   | 0.23 | 1.92  | 1.55 | 8.81  | 0.79 | 1.66    |        |      |      |       |      |      |       |
| M18                         | LY/TLA/TRf    | 0.91 | 0.33   | 0.40 | 3.06  |      |       |      |         | 1.75   | 1.01 |      |       |      |      |       |
| M19                         | LY/TLA/TRm    | 0.83 | 0.35   | 0.44 | 3.26  |      |       |      |         |        |      | 1.15 | 1.41  |      |      |       |
| M28                         | LY/TLA/SN     | 0.49 | 0.32   | 0.23 | 4.33  |      |       |      |         |        |      |      |       | 2.26 | 0.86 | 3.01  |
| M40                         | LY/CY/TRm     | 1.04 |        |      |       | 2.41 | 8.36  | 0.45 | 1.20    | 1.42   | 0.29 |      |       |      |      |       |
| M42                         | LY/CY/TRm     | 1.15 |        |      |       | 2.11 | 5.95  | 0.40 | 0.93    |        |      | 0.98 | 0.97  |      |      |       |
| M87                         | TLA/CY/TRm    |      | 0.18   | 0.25 | 1.74  | 1.52 | 9.05  | 0.73 | 1.71    |        |      | 1.19 | 0.83  |      |      |       |
| M88                         | TLA/CY/TRf    |      | 0.18   | 0.33 | 1.58  | 1.79 | 10.62 | 0.74 | 1.69    | 1.46   | 0.41 |      |       |      |      |       |
| <b>Four-cluster models</b>  |               |      |        |      |       |      |       |      |         |        |      |      |       |      |      |       |
| M17                         | LY/TLA/CY/SN  | 0.51 | 0.21   | 0.11 | 2.73  | 1.49 | 6.81  | 1.59 | 0.80    |        |      |      |       | 2.17 | 0.51 | 2.87  |
| M20                         | LY/TLA/TRf/SN | 0.53 | 0.35   | 0.20 | 4.17  |      |       |      |         | 1.74   | 0.75 |      |       | 2.39 | 0.66 | 2.80  |
| M21                         | LY/TLA/TRm/SN | 0.46 | 0.25   | 0.25 | 4.45  |      |       |      |         |        |      | 1.40 | 0.48  | 2.56 | 0.82 | 3.82  |
| M41                         | LY/CY/TRf/SN  | 0.84 |        |      |       | 2.34 | 10.18 | 0.92 | 0.70    | 1.86   | 0.18 |      |       | 1.44 | 0.25 | 2.22  |
| M43                         | LY/CY/TRm/SN  | 0.91 |        |      |       | 2.20 | 6.69  | 0.70 | 0.62    |        |      | 1.00 | 0.56  | 1.19 | 0.39 | 2.80  |
| M85                         | TLA/CY/TRf/SN |      | 0.22   | 0.21 | 1.84  | 1.58 | 9.86  | 1.32 | 0.85    | 2.39   | 0.33 |      |       | 1.83 | 0.27 | 2.14  |
| M105                        | TLA/CY/TRm/SN |      | 0.17   | 0.19 | 1.88  | 1.48 | 8.21  | 1.28 | 1.03    |        |      | 1.24 | 0.50  | 1.67 | 0.44 | 2.62  |
