# Supplementary material for: Gene-Function-Based Clusters Explore Intricate Networks of Gene Expression of Circulating Tumor Cells in Patients with Colorectal Cancer
Source: MDPI journal article supplement (doi:10.3390/biomedicines11010145), 2023-01-06

Supplementary Figure S1. STRING Analysis of 15 Investigated Genes

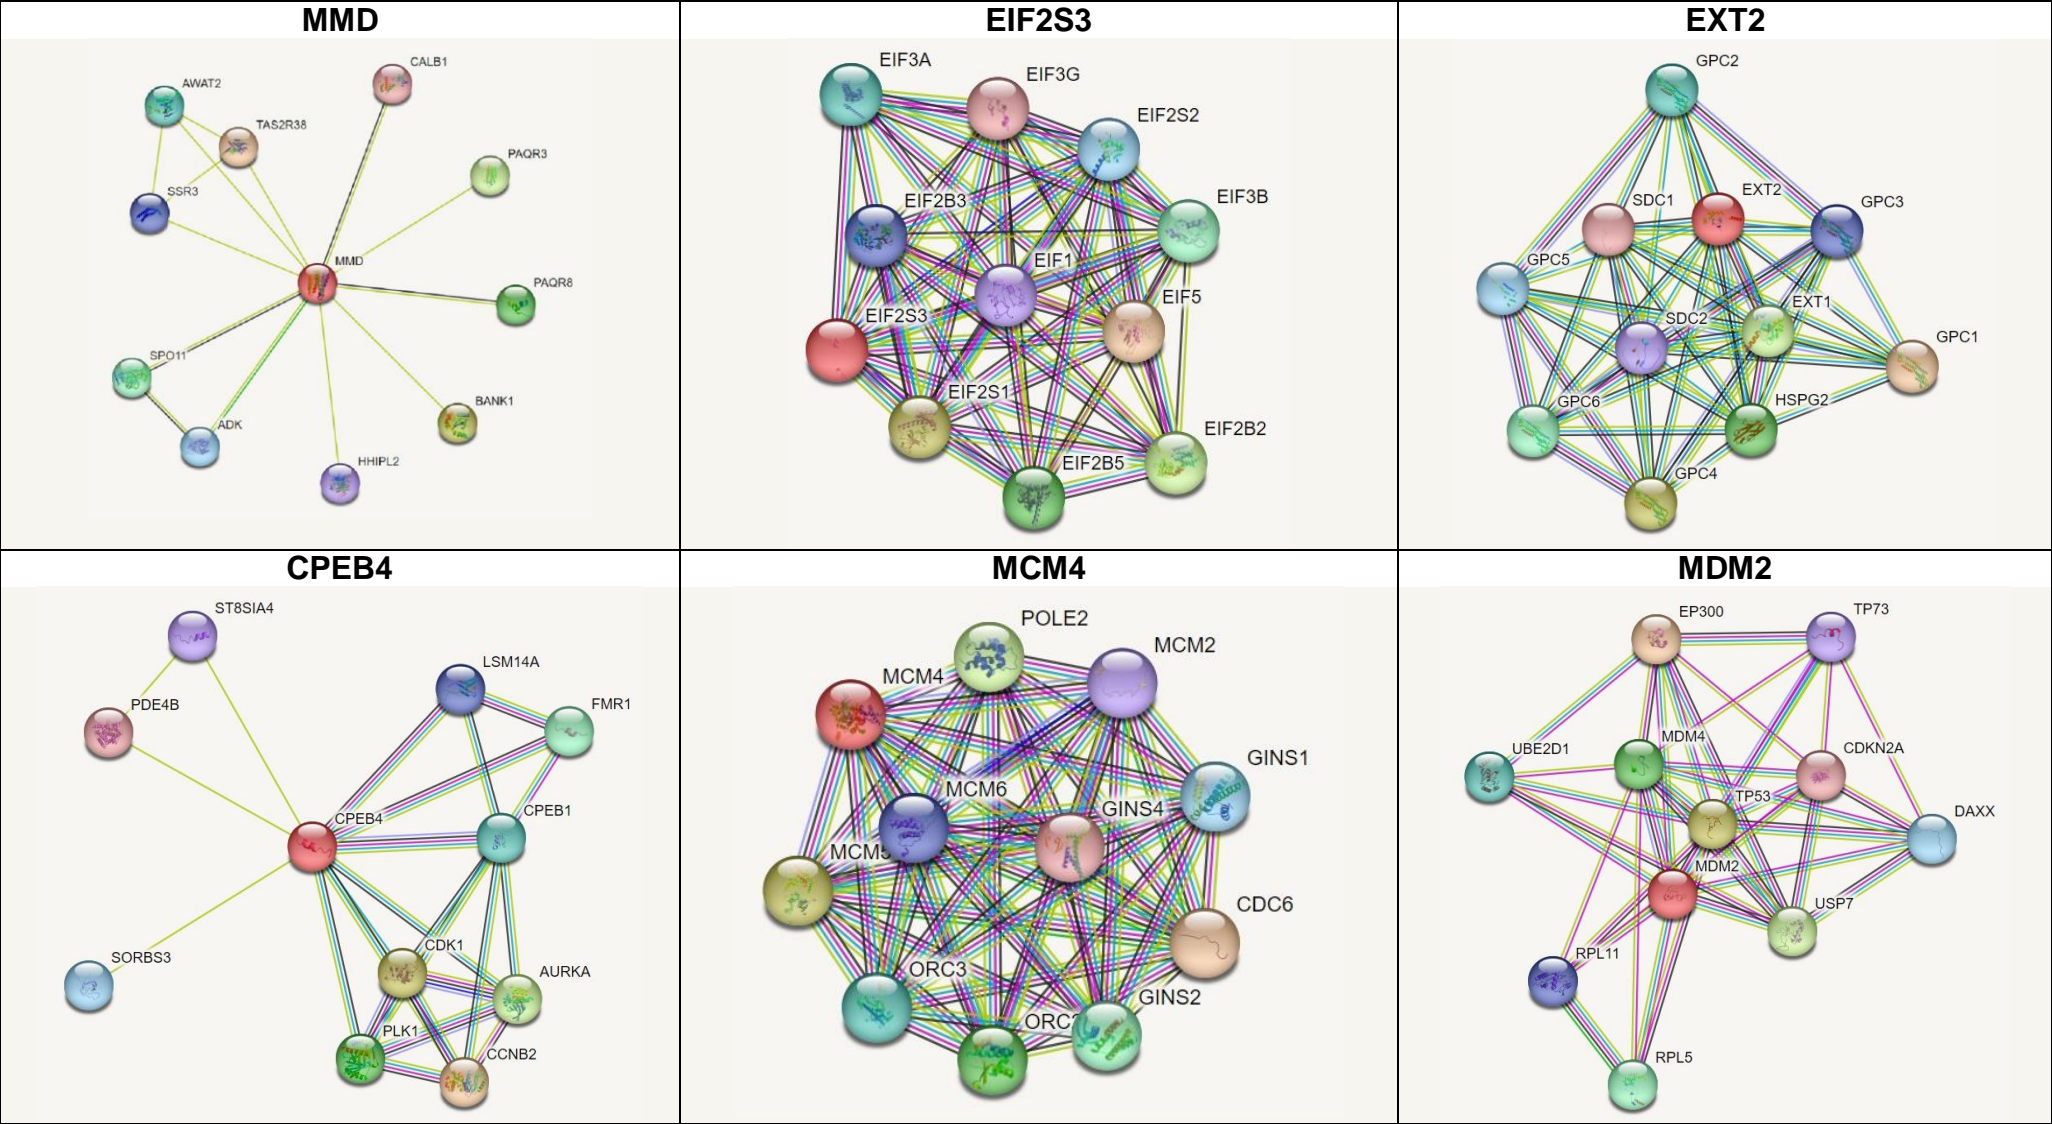

Supplementary Figure S1. STRING Analysis of 15 Investigated Genes (continued)

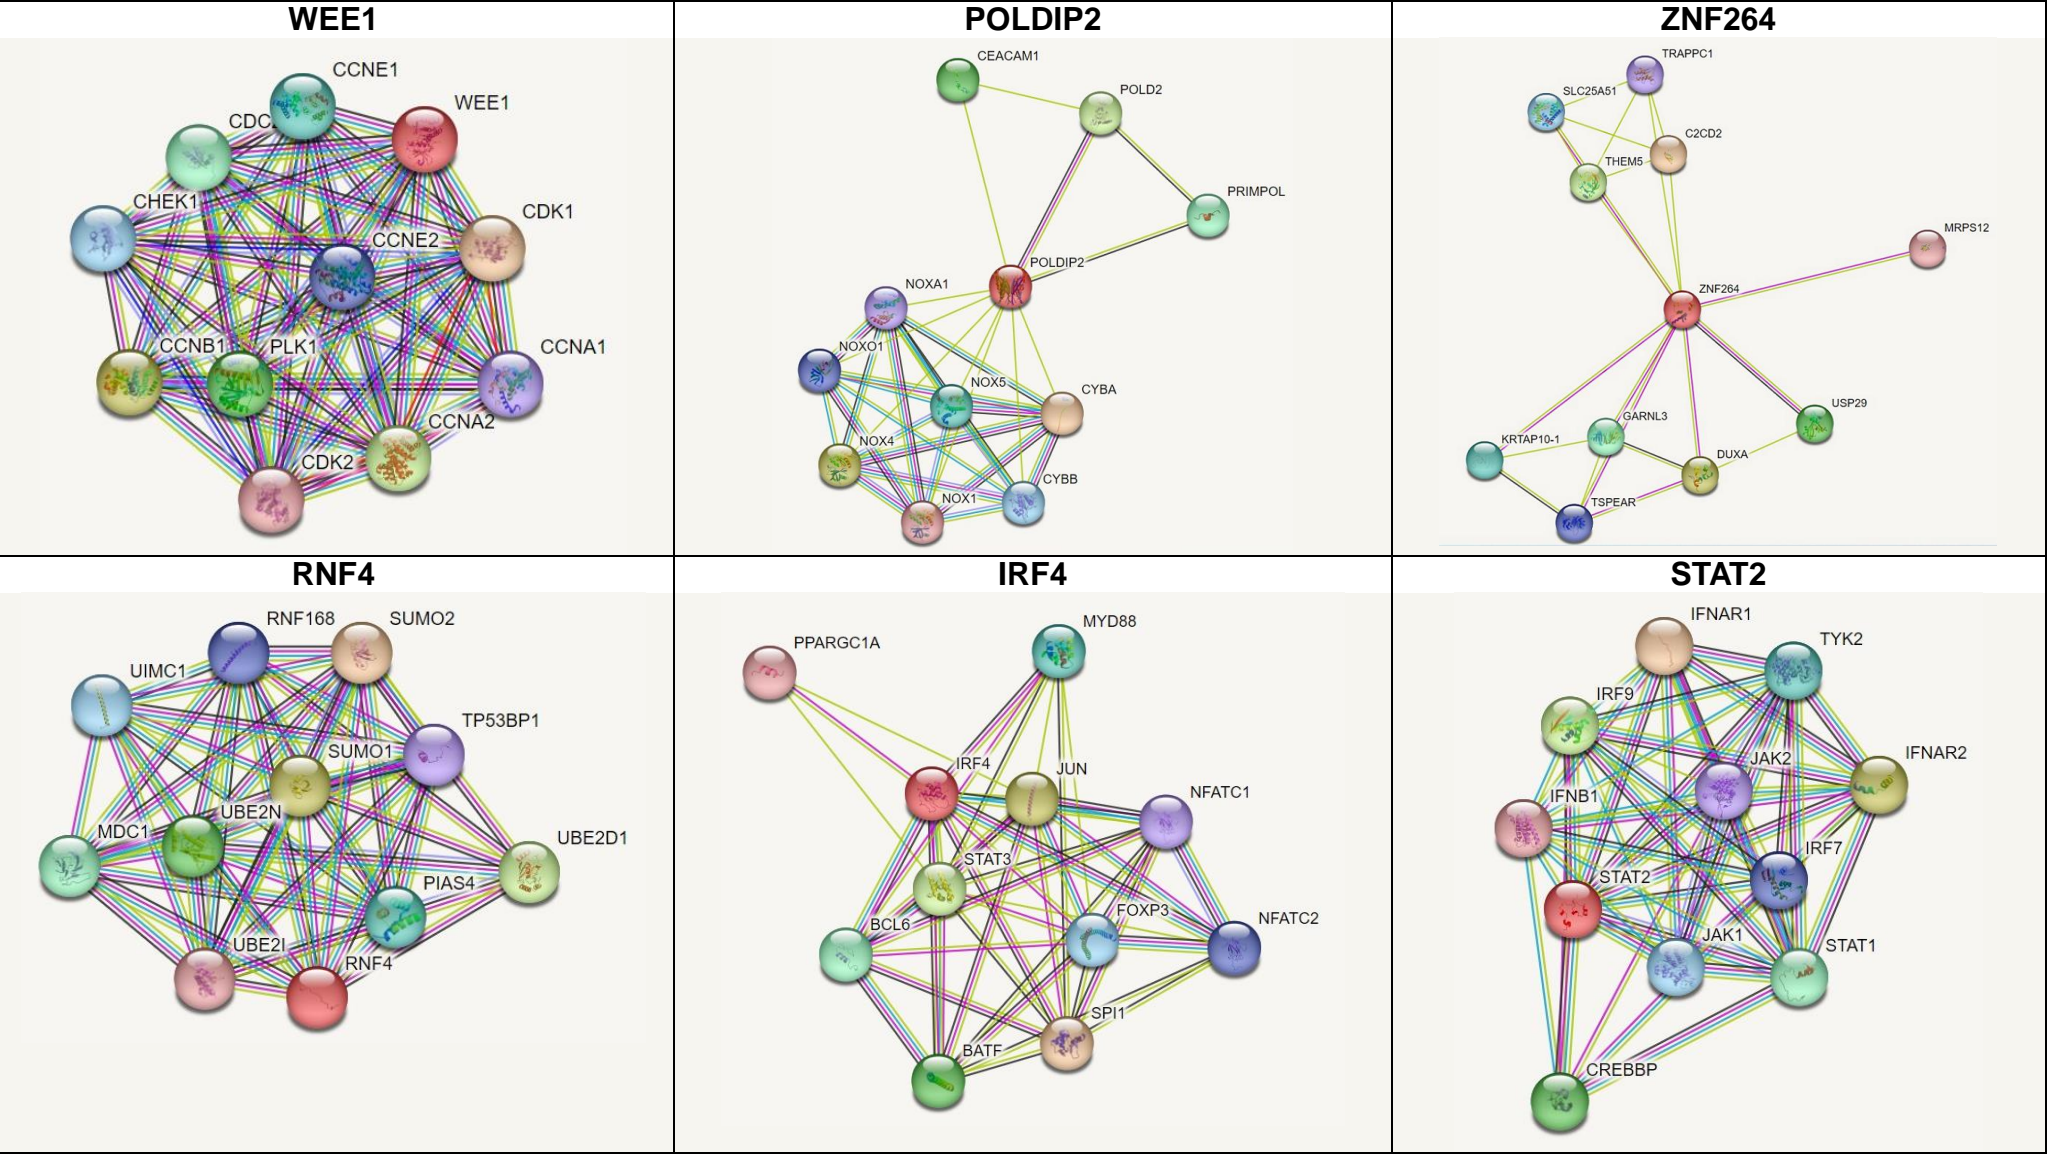



Supplementary Figure S1. STRING Analysis of 15 Investigated Genes (continued)

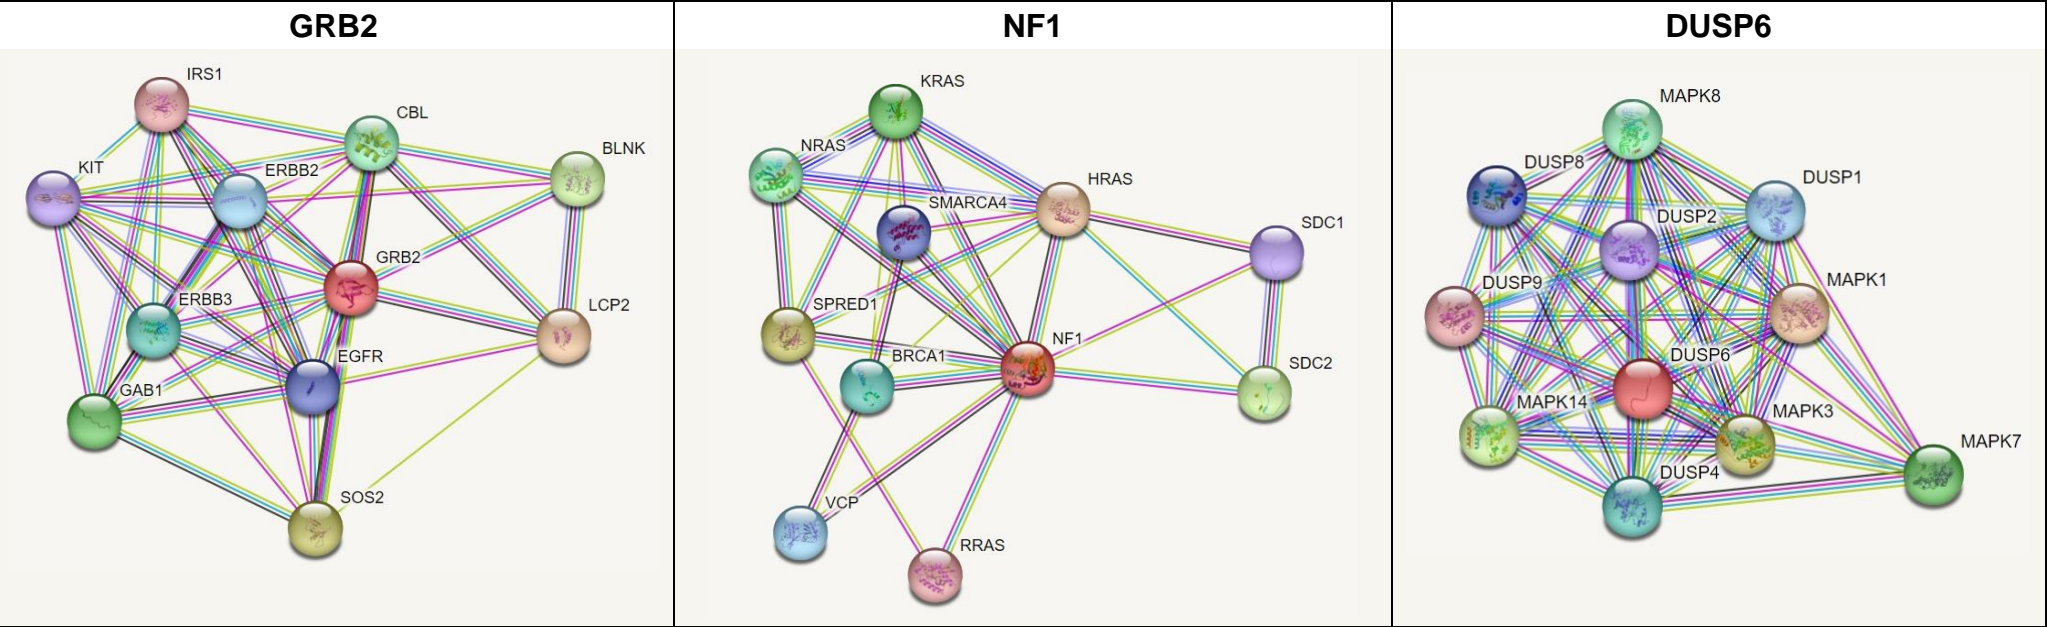

Supplement: s1 [file s1]
